# Supplementary material for: Community control strategies for scabies: A cluster randomised noninferiority trial
Source: PubMed Central journal article supplement (PMC8612541; doi:10.1371/journal.pmed.1003849), 2021-11-10
Supplement: pmed.1003849.s001.pdf [file pmed.1003849.s001.pdf]

**S1 Table. Medication dosing schedule by weight or age**

| <b>Medication</b>                       | <b>Dose</b>        |
|-----------------------------------------|--------------------|
| <b>Ivermectin, oral, 200 µg/kg</b>      |                    |
| < 15 kg                                 | 0 tablet           |
| 15–23 kg                                | 1 tablet (3 mg)    |
| 24–38 kg                                | 2 tablets (6 mg)   |
| 39–53 kg                                | 3 tablets (9 mg)   |
| 54–68 kg                                | 4 tablets (12 mg)  |
| 69–83 kg                                | 5 tablets (15 mg)  |
| 84–98 kg                                | 6 tablets (18 mg)  |
| ≥ 99 kg                                 | 7 tablets (21 mg)  |
|                                         |                    |
| <b>Permethrin 5%, topical</b>           |                    |
| Age < 2 months                          | Apply for 4 hours  |
| Age ≥ 2 months                          | Apply for 8 hours  |
|                                         |                    |
| <b>Diethylcarbamazine, oral, 6mg/kg</b> |                    |
| < 15 kg                                 | 0 tablet           |
| 15–25 kg                                | 1 tablet (100 mg)  |
| 26–41 kg                                | 2 tablets (200 mg) |
| 42–58 kg                                | 3 tablets (300 mg) |
| 59–75 kg                                | 4 tablets (400 mg) |
| 76–92 kg                                | 5 tablets (500 mg) |
| ≥ 93 kg                                 | 6 tablets (600 mg) |
|                                         |                    |
| <b>Albendazole, oral</b>                |                    |
| < 15 kg                                 | 0 tablet           |
| ≥ 15 kg                                 | 1 tablet (400 mg)  |
